# Supplementary material for: Unveiling the Roles of Low-Density Lipoprotein Receptor-Related Protein 6 in Intestinal Homeostasis, Regeneration and Oncogenesis
Source: MDPI journal article supplement (doi:10.3390/cells10071792), 2021-07-15
Supplement: s1 [file s1]

**Table S1. Histological damage scoring**

| <b>Histological features</b>                                                                 | <b>Score</b> | <b>Observations</b>                                                 |
|----------------------------------------------------------------------------------------------|--------------|---------------------------------------------------------------------|
| Extent of destruction of normal mucosal architecture                                         | 0            | Normal                                                              |
|                                                                                              | 1            | Mild (destruction in less than 25% of the colon length)             |
|                                                                                              | 2            | Moderate                                                            |
|                                                                                              | 3            | Extensive damage (destruction in more than 50% of the colon length) |
| Presence and degree of cellular infiltration                                                 | 0            | Normal                                                              |
|                                                                                              | 1            | Few and small areas of immune cell infiltrates                      |
|                                                                                              | 2            | Moderate number and/or size of immune cell infiltrates              |
|                                                                                              | 3            | Transmural infiltration                                             |
| Extent of muscle thickening                                                                  | 0            | Normal                                                              |
|                                                                                              | 1            | Mild (1/3 thickening maximum in some areas)                         |
|                                                                                              | 2            | Moderate (2/3 thickening maximum in some areas)                     |
|                                                                                              | 3            | Extensive thickening                                                |
| Presence or absence of crypt abscesses                                                       | 0            | Absent                                                              |
|                                                                                              | 1            | Present                                                             |
| Presence or absence of goblet cell depletion (at least 25% reduction in some inflamed areas) | 0            | Absent                                                              |
|                                                                                              | 1            | Present                                                             |

Histological damage scoring was assessed on hematoxylin and eosin-stained sections of the entire colon length. All scores were added for a maximum score of 11.
